# Supplementary material
Source: PubMed Central journal article supplement (PMC8756517)
Supplement: mmc1.pdf [file mmc1.pdf]

## Supplemental information

### Genetic factors associated with prostate cancer

#### conversion from active surveillance to treatment

Yu Jiang, Travis J. Meyers, Adaeze A. Emeka, Lauren Folgosa Cooley, Phillip R. Cooper, Nicola Lancki, Irene Helenowski, Linda Kachuri, Daniel W. Lin, Janet L. Stanford, Lisa F. Newcomb, Suzanne Kolb, Antonio Finelli, Neil E. Fleshner, Maria Komisarenko, James A. Eastham, Behfar Ehdai, Nicole Benfante, Christopher J. Logothetis, Justin R. Gregg, Cherie A. Perez, Sergio Garza, Jeri Kim, Leonard S. Marks, Merdie Delfin, Danielle Barsa, Danny Vesprini, Laurence H. Klotz, Andrew Loblaw, Alexandre Mamedov, S. Larry Goldenberg, Celestia S. Higano, Maria Spillane, Eugenia Wu, H. Ballentine Carter, Christian P. Pavlovich, Mufaddal Mamawala, Tricia Landis, Peter R. Carroll, June M. Chan, Matthew R. Cooperberg, Janet E. Cowan, Todd M. Morgan, Javed Siddiqui, Rabia Martin, Eric A. Klein, Karen Brittain, Paige Gotwald, Daniel A. Barocas, Jeremiah R. Dallmer, Jennifer B. Gordetsky, Pam Steele, Shilajit D. Kundu, Jazmine Stockdale, Monique J. Roobol, Lionne D.F. Venderbos, Martin G. Sanda, Rebecca Arnold, Dattatraya Patil, Christopher P. Evans, Marc A. Dall'Era, Anjali Vij, Anthony J. Costello, Ken Chow, Niall M. Corcoran, Soroush Rais-Bahrami, Courtney Phares, Douglas S. Scherr, Thomas Flynn, R. Jeffrey Karnes, Michael Koch, Courtney Rose Dhondt, Joel B. Nelson, Dawn McBride, Michael S. Cookson, Kelly L. Stratton, Stephen Farriester, Erin Hemken, Walter M. Stadler, Tuula Pera, Deimante Banionyte, Fernando J. Bianco Jr., Isabel H. Lopez, Stacy Loeb, Samir S. Taneja, Nataliya Byrne, Christopher L. Amling, Ann Martinez, Luc Boileau, Franklin D. Gaylis, Jacqueline Petkewicz, Nicholas Kirwen, Brian T. Helfand, Jianfeng Xu, Denise M. Scholtens, William J. Catalona, and John S. Witte

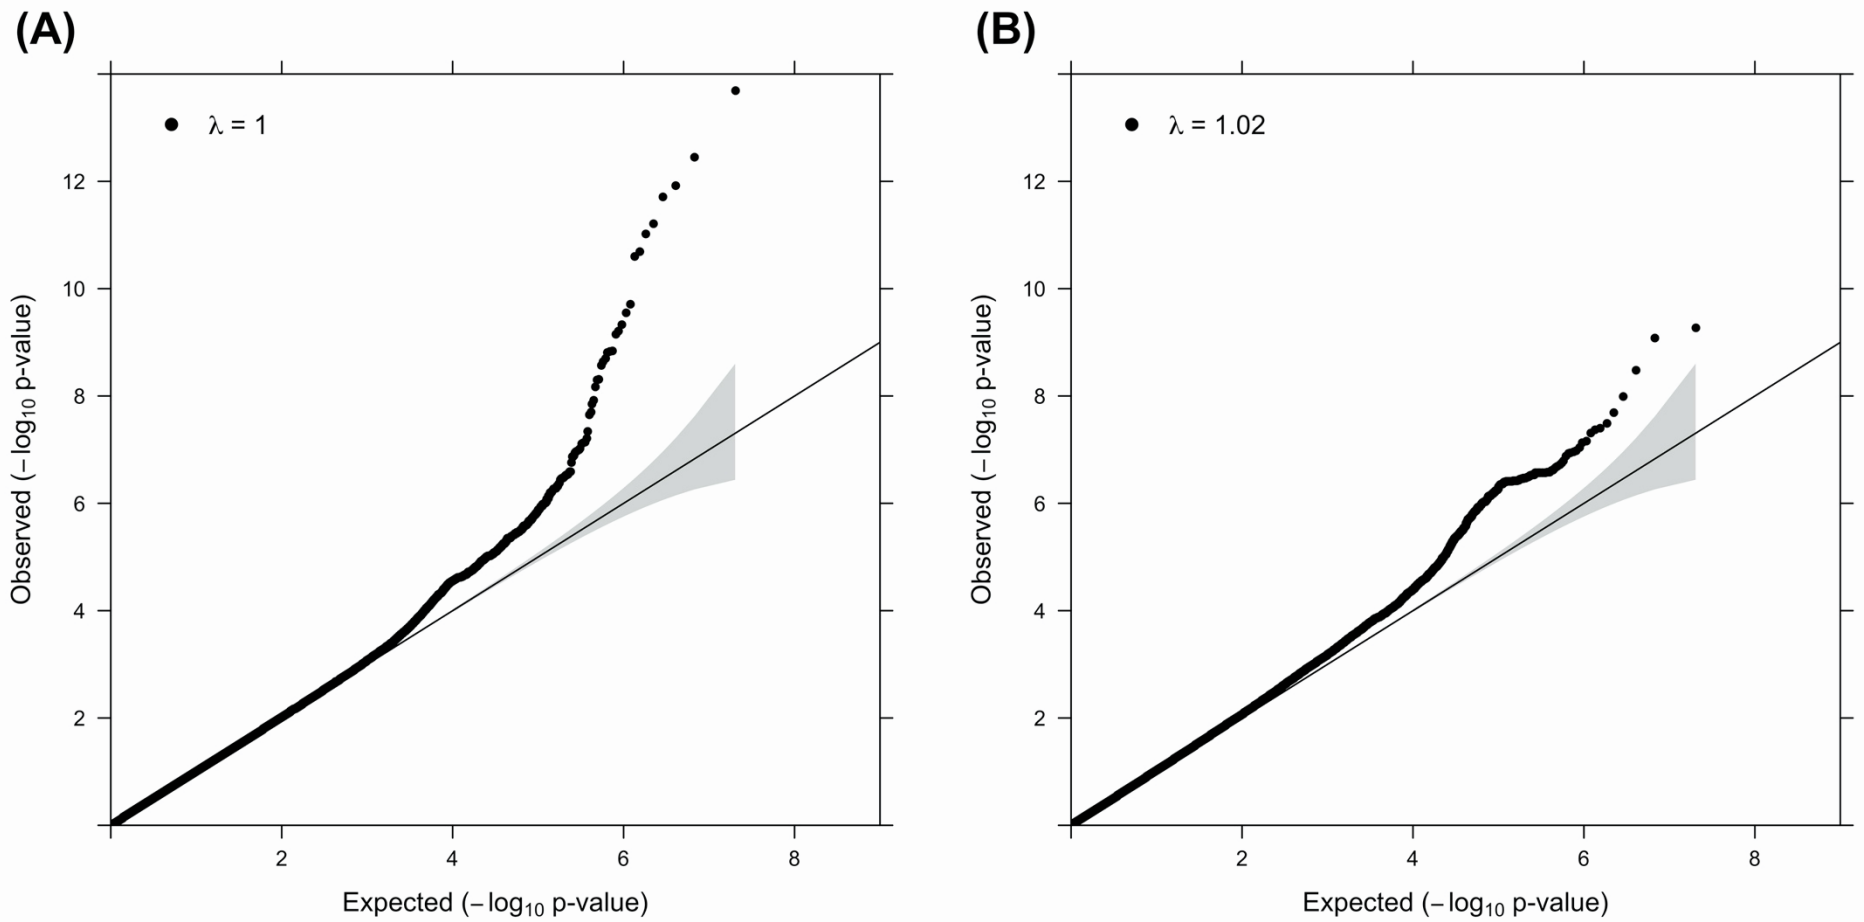

**Figure S1. QQ plots of the GWASs.** (A) QQ plot of GWAS in individuals of European ancestry. (B) QQ plot of combined GWAS meta-analysis of all individuals. Genomic control  $\lambda$  is shown.

| <b>Discovery Samples</b>                          |            |         |
|---------------------------------------------------|------------|---------|
| Restriction                                       | N Excluded | Total N |
| Genotyped at CIDR                                 |            | 6,324   |
| independent individuals                           | 23         | 6,301   |
| With > 6 months follow-up or no missing follow-up | 344        | 5957    |
| With no missing age/censoring status              | 21         | 5936    |
| Genetically European                              | 714        | 5,222   |
| Final N in discovery samples                      |            | 5,222   |

| <b>Replication Samples</b>                       |            |         |
|--------------------------------------------------|------------|---------|
| Restriction                                      | N Excluded | Total N |
| Genotyped at MD Anderson                         |            | 593     |
| With >6 months follow-up or no missing follow-up | 72         | 591     |
| Non-censored                                     | 37         | 484     |
| Genetically European                             | 59         | 425     |
| Non-European from CIDR                           |            | 714     |
| Final N in replication samples                   |            | 1,139   |

**Table S1: Summary of subjects included and excluded from the discovery GWAS and replication for the study of active surveillance conversion to treatment.**

|                                     | Discovery |              | Replication |              |                |                       |     |              |      |              |
|-------------------------------------|-----------|--------------|-------------|--------------|----------------|-----------------------|-----|--------------|------|--------------|
| Ancestral population                | European  |              | African     | Asian        | Latin American | European <sup>a</sup> |     |              |      |              |
| Sample size                         | 5,222     |              | 396         | 237          | 81             | 425                   |     |              |      |              |
| Mean age ( $\pm$ s.d.)              | 63.5      | ( $\pm$ 7.2) | 62          | ( $\pm$ 8.2) | 63.8           | ( $\pm$ 7.7)          | 63  | ( $\pm$ 7.2) | 64.4 | ( $\pm$ 8.2) |
| Median follow-up time (months, IQR) | 80        | (51,112)     | 68          | (40,106)     | 86             | (54,118)              | 59  | (33,85)      | 80   | (31,110)     |
| Gleason grade                       |           |              |             |              |                |                       |     |              |      |              |
| GG1                                 | 4,819     | (92%)        | 359         | (91%)        | 219            | (92%)                 | 77  | (95%)        | 372  | (87%)        |
| GG2                                 | 344       | (7%)         | 32          | (8%)         | 15             | (6%)                  | 4   | (5%)         | 48   | (11%)        |
| $\geq$ GG3                          | 55        | (1%)         | 4           | (1%)         | 3              | (1%)                  | 0   | (0%)         | 5    | (1%)         |
| PSA (MAD)                           | 5.0       | ( $\pm$ 2.1) | 5.3         | ( $\pm$ 2.0) | 5.3            | ( $\pm$ 2.5)          | 4.7 | ( $\pm$ 2.4) | 4.1  | ( $\pm$ 2.2) |
| Clinical tumor stage                |           |              |             |              |                |                       |     |              |      |              |
| cT1                                 | 4,138     | 79%          | 322         | 81%          | 161            | 68%                   | 66  | 81%          | 372  | 88%          |
| cT2                                 | 641       | 12%          | 49          | 12%          | 39             | 16%                   | 9   | 11%          | 53   | 12%          |
| cT3 or cT4                          | 34        | 1%           | 5           | 1%           | 5              | 2%                    | 1   | 1%           | 0    | 0%           |
| Number of cores                     |           |              |             |              |                |                       |     |              |      |              |
| 1-2                                 | 4,113     | (79%)        | 298         | (75%)        | 177            | (75%)                 | 67  | (83%)        | 386  | (91%)        |
| 3                                   | 451       | (9%)         | 44          | (11%)        | 20             | (8%)                  | 7   | (9%)         | 27   | (6%)         |
| $\geq$ 4                            | 522       | (10%)        | 39          | (10%)        | 37             | (16%)                 | 7   | (9%)         | 12   | (3%)         |
| PC risk category                    |           |              |             |              |                |                       |     |              |      |              |
| Low                                 | 3,639     | (70%)        | 262         | (66%)        | 141            | (59%)                 | 59  | (73%)        | 314  | (74%)        |
| Intermediate                        | 983       | (19%)        | 82          | (21%)        | 53             | (22%)                 | 14  | (17%)        | 91   | (21%)        |
| High                                | 599       | (11%)        | 52          | (13%)        | 43             | (18%)                 | 8   | (10%)        | 20   | (5%)         |
| Number of conversions               |           |              |             |              |                |                       |     |              |      |              |
| Tumor upgrading                     | 1609      |              | 123         |              | 88             |                       | 21  |              | 77   |              |
| Tumor volume progression            | 920       | (57%)        | 68          | (55%)        | 51             | (58%)                 | 13  | (62%)        | 44   | (57%)        |
|                                     | 147       | (9%)         | 10          | (8%)         | 6              | (7%)                  | 0   | (0%)         | 53   | (69%)        |

|                    |           |          |          |         |         |
|--------------------|-----------|----------|----------|---------|---------|
| PSA Progression    | 219 (14%) | 20 (16%) | 15 (17%) | 0 (0%)  | 3 (4%)  |
| Other Reason       | 134 (8%)  | 14 (11%) | 4 (5%)   | 2 (10%) | 4 (5%)  |
| No Reason Reported | 317 (20%) | 21 (17%) | 20 (23%) | 6 (29%) | 9 (12%) |

**Table S2. Characteristics of active surveillance patients included in the discovery and replication genome-wide association study.**

a. MD Anderson samples of European Ancestry.

IQR, interquartile range; MAD, median absolute deviation; PSA, prostate-specific antigen; PC, prostate cancer.

Men of genetically inferred European ancestry genotyped by CIDR are included in the discovery GWAS. The other participants genotyped by CIDR and men from MD Anderson are included in the replication.

Age and cancer clinical characteristics were measured at diagnosis.

PC risk categories:

Low-risk patients had all the following criteria: GG1 only (Gleason  $\leq$  3+3), PSA <10 ng/mL, clinical stage T1, and  $\leq$  3 positive biopsy cores.

Intermediate-risk patients had any of the following, with no high-risk criteria: GG2 (Gleason 3+4), PSA 10-20 ng/mL, or clinical stage T2.

High-risk patients had any of the following:  $\geq$  GG3 ( $\geq$  Gleason 4+3), PSA  $\geq$ 20 ng/mL, clinical stage  $\geq$ T3, or  $\geq$  4 positive biopsy cores.

Percentages do not all sum to 100% due to missingness.

| Model                                              | GRS <sub>PC</sub> <sup>d</sup> |            |                       | GRS <sub>PSA</sub> <sup>d</sup> |            |                      | AUC   |
|----------------------------------------------------|--------------------------------|------------|-----------------------|---------------------------------|------------|----------------------|-------|
|                                                    | HR                             | 95% CI     | P-value               | HR                              | 95% CI     | P-value              |       |
| Reference model <sup>a</sup>                       |                                |            |                       |                                 |            |                      | 0.550 |
| PC clinical characteristics <sup>b</sup>           |                                |            |                       |                                 |            |                      | 0.653 |
| PC GRS <sup>c</sup>                                | 1.18 <sup>e</sup>              | 1.12, 1.23 | $5.6 \times 10^{-11}$ |                                 |            |                      | 0.576 |
| PSA GRS <sup>c</sup>                               |                                |            |                       | 0.92 <sup>e</sup>               | 0.88, 0.96 | $3.9 \times 10^{-4}$ | 0.557 |
| PC clinical characteristics + PC GRS <sup>c</sup>  | 1.13 <sup>e</sup>              | 1.07, 1.19 | $3.3 \times 10^{-6}$  |                                 |            |                      | 0.659 |
| PC clinical characteristics + PSA GRS <sup>c</sup> |                                |            |                       | 0.94 <sup>e</sup>               | 0.89, 0.98 | $8.5 \times 10^{-3}$ | 0.655 |
| PC clinical characteristics + PC GRS + PSA GRS     | 1.15 <sup>e</sup>              | 1.09, 1.22 | $1.5 \times 10^{-7}$  | 0.91 <sup>e</sup>               | 0.87, 0.96 | $3.0 \times 10^{-4}$ | 0.661 |

**Table S3. ROC analysis of PC and PSA GRS compared to clinical characteristics for conversion from AS to treatment.**

<sup>a</sup> All models contain age and the first 10 principal components.

<sup>b</sup> PC clinical characteristics were Gleason grade group (GG1, GG2, or  $\geq$  GG3); PSA concentration (ng/mL); clinical stage (cT1, cT2, or cT3/cT4); and number of positive biopsy cores (1-2, 3, or  $\geq$  4).

<sup>c</sup> PC GRS is constructed from 269 prostate cancer associated variants, while PSA GRS is derived from 36 PSA risk variants.

<sup>d</sup> The test statistics of GRS<sub>PC</sub> and GRS<sub>PSA</sub> are reported when the model contains them.

<sup>e</sup> The HRs correspond to a one SD increase in the GRS.

|               | Minimally Adjusted |            |        | Fully Adjusted  |            |        |
|---------------|--------------------|------------|--------|-----------------|------------|--------|
|               | HR <sup>a</sup>    | 95% CI     | P      | HR <sup>b</sup> | 95% CI     | P      |
| <b>Decile</b> |                    |            |        |                 |            |        |
| 0-10          | 0.73               | 0.60, 0.89 | 0.0016 | 0.69            | 0.56, 0.86 | 0.0010 |
| 10-20         | 0.81               | 0.68, 0.98 | 0.030  | 0.83            | 0.68, 1.01 | 0.067  |
| 20-30         | 0.93               | 0.78, 1.11 | 0.44   | 0.99            | 0.82, 1.20 | 0.95   |
| 30-40         | 0.83               | 0.69, 0.99 | 0.041  | 0.82            | 0.67, 0.99 | 0.043  |
| 40-60         | 1.00               | Reference  |        | 1.00            | Reference  |        |
| 60-70         | 1.06               | 0.89, 1.26 | 0.50   | 1.03            | 0.86, 1.24 | 0.72   |
| 70-80         | 1.10               | 0.92, 1.30 | 0.30   | 1.02            | 0.85, 1.22 | 0.87   |
| 80-90         | 1.23               | 1.04, 1.46 | 0.014  | 1.15            | 0.96, 1.37 | 0.13   |
| 90-100        | 1.27               | 1.07, 1.51 | 0.0061 | 1.13            | 0.94, 1.36 | 0.18   |

**Table S4. Hazard ratios for the association between time to AS failure with prostate cancer GRS.**

HR = Hazard Ratio; CI = Confidence Interval

<sup>a</sup> Hazard ratios are adjusted for age and the first 10 genetic principal components

<sup>b</sup> Hazard ratios are adjusted for age, the first 10 genetic principal components, Gleason grade group (GG1, GG2, or  $\geq$  GG3); PSA concentration (ng/mL); clinical stage (cT1, cT2, or cT3/cT4); and number of positive biopsy cores (1-2, 3, or  $\geq$  4).

|               | Minimally Adjusted |            |        | Fully Adjusted  |            |       |
|---------------|--------------------|------------|--------|-----------------|------------|-------|
|               | HR <sup>a</sup>    | 95% CI     | P      | HR <sup>b</sup> | 95% CI     | P     |
| <b>Decile</b> |                    |            |        |                 |            |       |
| 0-10          | 1.28               | 1.08, 1.52 | 0.0044 | 1.25            | 1.04, 1.50 | 0.017 |
| 10-20         | 1.08               | 0.90, 1.29 | 0.40   | 1.01            | 0.83, 1.22 | 0.96  |
| 20-30         | 1.15               | 0.97, 1.37 | 0.11   | 1.18            | 0.98, 1.42 | 0.083 |
| 30-40         | 1.16               | 0.98, 1.38 | 0.088  | 1.16            | 0.96, 1.39 | 0.12  |
| 40-60         | 1.00               | Reference  |        | 1.00            | Reference  |       |
| 60-70         | 1.08               | 0.90, 1.29 | 0.40   | 1.05            | 0.86, 1.27 | 0.65  |
| 70-80         | 1.00               | 0.83, 1.19 | 0.96   | 0.96            | 0.79, 1.17 | 0.70  |
| 80-90         | 0.98               | 0.82, 1.18 | 0.84   | 1.02            | 0.84, 1.24 | 0.87  |
| 90-100        | 0.95               | 0.79, 1.15 | 0.60   | 0.97            | 0.79, 1.19 | 0.78  |

**Table S5. Hazard ratios for the association between time to AS failure with prostate-specific antigen GRS.**

HR = Hazard Ratio; CI = Confidence Interval

<sup>a</sup> Hazard ratios are adjusted for age and the first 10 genetic principal components

<sup>b</sup> Hazard ratios are adjusted for age, the first 10 genetic principal components, Gleason grade group (GG1, GG2, or  $\geq$  GG3); PSA concentration (ng/mL); clinical stage (cT1, cT2, or cT3/cT4); and number of positive biopsy cores (1-2, 3, or  $\geq$  4).
